# Supplementary material for: Enhanced Stomatal Conductance Supports Photosynthesis in Wheat to Improved NH4+ Tolerance
Source: MDPI journal article supplement (doi:10.3390/plants13010086), 2023-12-27
Supplement: s1 [file s1]

## Supplementary Material

**Table S1** Eigenvalue and cumulative contribution of PCs of photosynthetic parameter and their corresponding loading

| PCs                                   | Eigenvalue     | Variance contribution rate % | Cumulative contribution rate % |
|---------------------------------------|----------------|------------------------------|--------------------------------|
| 1                                     | 9.91848        | 56.80025                     | 56.80025                       |
| 2                                     | 2.81164        | 17.49358                     | 74.29384                       |
| 3                                     | 1.77146        | 10.96433                     | 85.25817                       |
| Photosynthesis and related parameters |                | Loading                      |                                |
|                                       |                | PC1                          | PC2                            |
| Osmotic substances                    | Suc            | 0.09407                      | 0.19112                        |
|                                       | K <sup>+</sup> | 0.25998                      | 0.11004                        |
|                                       | RWC            | 0.26668                      | 0.14955                        |
| Leaf moisture status                  | ψ <sub>p</sub> | 0.31871                      | -0.03719                       |
|                                       | ψ <sub>s</sub> | 0.29453                      | 0.05814                        |
|                                       | ψ <sub>m</sub> | 0.31042                      | 0.01048                        |
|                                       | Tr             | 0.31471                      | 0.04608                        |
|                                       | l              | -0.30989                     | -0.12071                       |
| Photosynthesis                        | g <sub>m</sub> | -0.11068                     | 0.38633                        |
|                                       | Ci             | 0.04836                      | 0.46685                        |
|                                       | A              | 0.3065                       | 0.11886                        |
|                                       | g <sub>s</sub> | 0.30575                      | 0.16694                        |
|                                       | Je             | -0.24672                     | 0.33996                        |
| Chlorophyll fluorescence              | Y(II)          | -0.24672                     | 0.33996                        |
|                                       | NPQ            | -0.004                       | 0.47595                        |
|                                       | Fv/Fm          | 0.22116                      | -0.20142                       |

**Table S2** The concentration and components of macronutrients in both treatments

| Treatment | N (5 mM)                                             | K (3 mM)                                                         | Ca (1.5 mM)                           | Mg (1 mM)         | P (1 mM)                        |
|-----------|------------------------------------------------------|------------------------------------------------------------------|---------------------------------------|-------------------|---------------------------------|
| AN        | (NH <sub>4</sub> ) <sub>2</sub> SO <sub>4</sub>      | KH <sub>2</sub> PO <sub>4</sub> / K <sub>2</sub> SO <sub>4</sub> | CaCl <sub>2</sub> / CaSO <sub>4</sub> | MgSO <sub>4</sub> | KH <sub>2</sub> PO <sub>4</sub> |
| NN        | Ca(NO <sub>3</sub> ) <sub>2</sub> / KNO <sub>3</sub> | KH <sub>2</sub> PO <sub>4</sub> / KNO <sub>3</sub>               | Ca(NO <sub>3</sub> ) <sub>2</sub>     | MgSO <sub>4</sub> | KH <sub>2</sub> PO <sub>4</sub> |

Note: AN, ammonium stress treatment; NN, nitrite treatment.

**Table S3.** The primer sequence in this study

| Gene name       | Primer sequence (5' → 3') | Primer sequence (3' → 5') |
|-----------------|---------------------------|---------------------------|
| <i>TaHAI</i>    | CAACGACAAGAGCAGCTACC      | GATGGTGTCTGATGTCAAGGC     |
| <i>TaKAT1</i>   | TTCTGGGATGGGCTTCACAT      | CCAGAATCTGTAGCGGGGAT      |
| <i>TaKOR1</i>   | CAAGGCAGTGCAGTTGATCA      | TCTCCTCTTGACCGTCTTCG      |
| <i>TaTIP2.3</i> | GCCATTCTAAGCCACCAT        | ATGAACTCGGCGATGTAG        |
| <i>TaPIP1.2</i> | TCCTCTGTCTGAACTTGA        | GAATACTACTGCTACCACAT      |
| <i>TaTIP1:1</i> | TATGAGGCGTTAGTTACC        | CTGCTCCAATCATTCAAC        |
| <i>TaAKT1</i>   | CCCTACGACCGCCGATAC        | ATTCTGATGGGATGGTGGAG      |
| <i>ACT</i>      | CAGCAACTGGGATGATATGG      | ATTTCGCTTTCAGCAGTGGT      |
| <i>ADP</i>      | GAGATGCGGATCCTGATGGT      | CCCCGAGCTTGAGCTTGTAG      |
